# Supplementary material
Source: PubMed Central journal article supplement (PMC4813388)
Supplement: BPH-173-212-s001.pdf [file BPH-173-212-s001.pdf]

|                  | <b>Myosin-9<br/>expression</b> | <b>mRNA IC<sub>50</sub> of HHT(ng ml<sup>-1</sup>)</b> |
|------------------|--------------------------------|--------------------------------------------------------|
| <b>Kasumi-1</b>  | 1 ± 0.12                       | 16.06 ± 3.17                                           |
| <b>HL-60</b>     | 3.36 ± 0.24                    | 16.92 ± 4.22                                           |
| <b>K562</b>      | 0.85 ± 0.36                    | 38.42 ± 5.68                                           |
| <b>U937</b>      | 2.87 ± 0.47                    | 22.64 ± 5.14                                           |
| <b>THP-1</b>     | 4.89 ± 0.54                    | 29.48 ± 6.01                                           |
| <b>Patients1</b> | 7.18 ± 1.03                    | 10.32 ± 2.76                                           |
| <b>Patients2</b> | 4.41 ± 0.85                    | 15.76 ± 3.49                                           |
| <b>Patients3</b> | 2.18 ± 0.28                    | 16.09 ± 4.08                                           |

**Supplementary table1. The baseline expression of myosin-9 and IC50 values of HHT in AML cells.** The level of myosin-9 mRNA in a selection of AML cell lines and human primary hematopoietic stem/progenitor cells was examined by real-time PCR. The myosin-9 mRNA expression in Kasumi-1 was used as control. The data are presented the mean ± S.D. of the results from six independent experiments

## Supplementary Method

### Quantitative polymerase chain reaction (qPCR)

The expression level of the myosin-9 gene was determined using reverse transcription-qPCR with SYBR Green I [Takara Biotechnology, Dalian, China], and GAPDH was used as a reference gene. Total RNA was extracted using TRIzol (Invitrogen Life Technologies, Carlsbad, CA, USA) and reverse transcribed into cDNA by a SuperScript II first-strand cDNA synthesis kit (Invitrogen Life Technologies). The reaction system contained 12.5  $\mu$ l 2X SYBR Premix Ex Taq [Takara Biotechnology], 1  $\mu$ l cDNAs and 10 pmol of each primer. The reaction was performed at 95  $^{\circ}$ C for 1 min, followed by 40 cycles of denaturation at 95  $^{\circ}$ C for 15 sec and annealing/extension at 60  $^{\circ}$ C for 60 sec, on an iQ5 Real-Time PCR instrument (Bio-Rad Laboratories, Hercules, CA, USA).

The primer sequences were as follows:

Forward, 5'-ATGGGGAAGGTGAAGGTCG-3' and reverse,

5'-GGGTCATTGATGGCAACAATATC-3' for GAPDH; Forward, 5'-

ACCCGTGGTGGAAGTACTGAC -3' and reverse, 5'- CATCTACCGACTGGTTGTGA

-3' for myosin-9.
